# Supplementary material
Source: PubMed Central journal article supplement (PMC4656060)
Supplement: NIHMS711063-supplement.pdf [file NIHMS711063-supplement.pdf]

**Appendix**  
**Causes of Death Associated With Prolonged TV Viewing: NIH-AARP Diet and Health Study**  
**Keadle et al.**

**Appendix Table 1.** ICD-9 and ICD-10 Used to Classify for Leading Causes of Death

| <b>Cause of death</b>                                       | <b>ICD-9</b>            | <b>ICD-10</b>              |
|-------------------------------------------------------------|-------------------------|----------------------------|
| Cancer                                                      | 140–239                 | C00–C97 and D00–D48        |
| Heart disease                                               | 390–398,402,404,410-429 | I00–I09, I11, I13, I20–I51 |
| Stroke                                                      | 430–438                 | I60–I69                    |
| Diabetes                                                    | 250                     | E10–E14                    |
| Septicemia                                                  | 038                     | A40-A41                    |
| Hypertension without heart disease                          | 401,403                 | I10, 112                   |
| Pneumonia and influenza                                     | 480-487                 | J09-J18                    |
| Chronic obstructive pulmonary disease and allied conditions | 490-496                 | J40-J47                    |
| Chronic liver disease and cirrhosis                         | 571                     | K70, K73-K74               |
| Kidney disease                                              | 580-589                 | N00-N07, N17-N19, N25-N27  |
| Suicide and self-inflicted injury                           | 950-959                 | U03, X60-X84, Y87.0        |
| Accidents and adverse effects                               | 800-949                 | V01-X59, Y85-Y86           |
| Alzheimer disease                                           | 331.0                   | G30                        |
| Parkinson disease                                           | 332                     | G20-21                     |

## **Supplemental Methods: Proportional Hazards Assumption**

In the fully adjusted model, the effect of TV viewing, as measured at baseline, changed with follow-up time. Letting TV be the variable for the h/day of TV viewing and t be the years of follow-up, we found that adding the TV x t interaction term offered a statistically significant improvement. This means there was a difference in the association between TV viewing and mortality at different follow-up times.

In order to determine where the deviation occurred, we then refit the model, allowing the effect of TV to differ for specific intervals of time. Let  $Z(t)$  be a time dependent variable, indicating whether years in the study exceeded t, and let  $X(t) = Z(t) \times TV$ , where TV is h/day of TV viewing. Then, given that we would allow two different coefficients for TV in the model, we determined the best time point for allowing the change by adding  $X(t)$ ,  $t \in \{2,4,6,8,10,12\}$ , to the model and identifying the value of t which corresponded to smallest p-value for  $X(t)$ . The value for t with the smallest p-value was 6 yrs. We tested whether a further split was required, but the p-value for subsequently added  $X(t)$  in  $\{2,4,8,10,12\}$ , were all above 0.05.

**Results:** Cox proportional Hazards Regression for 2-hr increase in TV viewing by follow-up time

|                                 | <b>Hazard Ratio</b> | <b>Lower 95% CI</b> | <b>Upper 95% CI</b> | <b>P-value</b> | <b>No. deaths</b> |
|---------------------------------|---------------------|---------------------|---------------------|----------------|-------------------|
| <b>Overall</b>                  | 1.14                | 1.12                | 1.17                | <0.001         | 36,590            |
| <b>&lt;6 years of follow-up</b> | 1.21                | 1.16                | 1.28                | <0.001         | 6,701             |
| <b>≥6 years of follow-up</b>    | 1.12                | 1.09                | 1.15                | <0.001         | 29,889            |

*Note:* Adjusted for age (y), race (white, black, other, missing), education (<12 y, high school graduate, some college, college graduate, missing), smoking history (never; quit, <20 cigarettes/d; quit, ≥20 cigarettes/d; current, <20 cigarettes/d; current, ≥20 cigarettes/d; unknown), MVPA (never or rarely, 1, 1–3, 4–7, ≥7 h/wk), health status (good, very good, excellent) and diet quality (quintiles), BMI categories (18.5 to <25, 25–<30, 30–35 and >35 kg/m<sup>2</sup>)

**Appendix**  
**Causes of Death Associated With Prolonged TV Viewing: NIH-AARP Diet and Health Study**  
**Keadle et al.**

While the risk estimates were higher in the first six years, the majority of deaths (82%) occurred in those who died greater than or equal to six years after baseline and the risk of death from increased TV viewing is highly significant at both time-periods. One potential explanation is reverse causation, where the increase in the HR can be explained by increased TV viewing among individuals with illnesses not captured by the questionnaire. Allowing for additional variation of the effect over time did not significantly improve the model. Therefore, the overall effect (HR=1.14) may be slightly higher than the long-term effects of current TV habits, we did not feel the small difference (HR=1.12 vs HR 1.14, 80% deaths occurred after 6 years) warranted reporting HR's by time period in the main text.

**Appendix**  
**Causes of Death Associated With Prolonged TV Viewing: NIH-AARP Diet and Health Study**  
**Keadle et al.**

**Appendix Table 2.** Association of TV Viewing Category and Cause-Specific Mortality: NIH-AARP Diet and Health Study

|                            | All<br>Participants<br>(N) | TV viewing (h/day) |                   |                   |                   |                   | P for<br>trend |
|----------------------------|----------------------------|--------------------|-------------------|-------------------|-------------------|-------------------|----------------|
|                            |                            | <1<br>17,035       | 1-2<br>68,281     | 3-4<br>97,993     | 5-6<br>31,003     | >7<br>8,990       |                |
| <b>All causes</b>          |                            |                    |                   |                   |                   |                   |                |
| No. of deaths              | 36,590                     | 1,851              | 9,368             | 16,722            | 6,452             | 2,197             |                |
| Age and Sex                |                            | ref                | 1.14 (1.08, 1.19) | 1.34 (1.28, 1.40) | 1.59 (1.51, 1.68) | 2.03 (1.91, 2.16) | <0.0001        |
| <b>Cancer</b>              |                            |                    |                   |                   |                   |                   |                |
| No. of deaths              | 15,161                     | 854                | 4,026             | 6,933             | 2,555             | 793               |                |
| Age and Sex                |                            | ref                | 1.08 (1.00, 1.16) | 1.25 (1.16, 1.34) | 1.43 (1.32, 1.54) | 1.64 (1.49, 1.81) | <0.0001        |
| <b>CHD</b>                 |                            |                    |                   |                   |                   |                   |                |
| No. of deaths              | 7,340                      | 319                | 1,805             | 3,374             | 1,328             | 514               |                |
| Age and Sex                |                            | ref                | 1.24 (1.10, 1.40) | 1.53 (1.36, 1.72) | 1.86 (1.65, 2.11) | 2.74 (2.38, 3.15) | <0.0001        |
| <b>Stroke</b>              |                            |                    |                   |                   |                   |                   |                |
| No. of deaths              | 1,748                      | 100                | 461               | 792               | 310               | 85                |                |
| Age and Sex                |                            | ref                | 1.01 (0.81, 1.25) | 1.11 (0.90, 1.36) | 1.29 (1.03, 1.62) | 1.32 (0.99, 1.77) | 0.00           |
| <b>COPD</b>                |                            |                    |                   |                   |                   |                   |                |
| No. of deaths              | 1,522                      | 49                 | 304               | 706               | 341               | 122               |                |
| Age and Sex                |                            | ref                | 1.38 (1.02, 1.87) | 2.07 (1.55, 2.77) | 3.02 (2.24, 4.08) | 4.02 (2.88, 5.60) | <0.0001        |
| <b>Accidents</b>           |                            |                    |                   |                   |                   |                   |                |
| No. of deaths              | 919                        | 61                 | 276               | 390               | 152               | 40                |                |
| Age and Sex                |                            | ref                | 1.02 (0.77, 1.34) | 0.96 (0.73, 1.26) | 1.18 (0.87, 1.59) | 1.17 (0.78, 1.75) | 0.22           |
| <b>Alzheimer disease</b>   |                            |                    |                   |                   |                   |                   |                |
| No. of deaths              | 796                        | 36                 | 235               | 354               | 136               | 35                |                |
| Age and Sex                |                            | ref                | 1.38 (0.97, 1.96) | 1.30 (0.92, 1.83) | 1.47 (1.02, 2.12) | 1.43 (0.90, 2.29) | 0.19           |
| <b>Diabetes</b>            |                            |                    |                   |                   |                   |                   |                |
| No. of deaths              | 767                        | 30                 | 138               | 365               | 164               | 70                |                |
| Age and Sex                |                            | ref                | 1.04 (0.70, 1.54) | 1.84 (1.27, 2.67) | 2.59 (1.75, 3.82) | 4.16 (2.71, 6.38) | <0.0001        |
| Model 2                    |                            | ref                | 0.84 (0.57, 1.25) | 1.24 (0.85, 1.80) | 1.41 (0.95, 2.10) | 1.93 (1.24, 2.98) | <0.0001        |
| <b>Influenza/pneumonia</b> |                            |                    |                   |                   |                   |                   |                |
| No. of deaths              | 550                        | 22                 | 149               | 244               | 92                | 43                |                |
| Age and Sex                |                            | ref                | 1.44 (0.92, 2.26) | 1.51 (0.98, 2.34) | 1.72 (1.08, 2.74) | 3.07 (1.84, 5.14) | <0.0001        |

**Appendix**  
**Causes of Death Associated With Prolonged TV Viewing: NIH-AARP Diet and Health Study**  
**Keadle et al.**

|                          |     |     |                   |                   |                   |                   |         |
|--------------------------|-----|-----|-------------------|-------------------|-------------------|-------------------|---------|
| <b>Parkinson disease</b> |     |     |                   |                   |                   |                   |         |
| No. of deaths            | 513 | 29  | 125               | 252               | 79                | 28                |         |
| Age and Sex              |     | ref | 0.89 (0.60, 1.34) | 1.16 (0.79, 1.71) | 1.12 (0.73, 1.71) | 1.57 (0.94, 2.65) | 0.01    |
| <b>Kidney disease</b>    |     |     |                   |                   |                   |                   |         |
| No. of deaths            | 429 | 22  | 87                | 210               | 76                | 34                |         |
| Age and Sex              |     | ref | 0.87 (0.54, 1.39) | 1.37 (0.88, 2.12) | 1.52 (0.94, 2.45) | 2.59 (1.51, 4.43) | <0.0001 |
| <b>Sepsis</b>            |     |     |                   |                   |                   |                   |         |
| No. of deaths            | 395 | 13  | 86                | 198               | 68                | 30                |         |
| Age and Sex              |     | ref | 1.49 (0.83, 2.67) | 2.26 (1.29, 3.97) | 2.39 (1.32, 4.33) | 3.93 (2.05, 7.53) | <0.0001 |
| <b>Liver disease</b>     |     |     |                   |                   |                   |                   |         |
| No. of deaths            | 374 | 19  | 92                | 159               | 75                | 29                |         |
| Age and Sex              |     | ref | 1.13 (0.69, 1.85) | 1.35 (0.84, 2.17) | 2.04 (1.23, 3.39) | 2.94 (1.65, 5.25) | <0.0001 |
| <b>Suicide</b>           |     |     |                   |                   |                   |                   |         |
| No. of deaths            | 292 | 14  | 70                | 140               | 55                | 13                |         |
| Age and Sex              |     | ref | 1.15 (0.65, 2.05) | 1.63 (0.94, 2.82) | 2.13 (1.18, 3.84) | 1.92 (0.90, 4.10) | 0.00    |
| <b>Hypertension</b>      |     |     |                   |                   |                   |                   |         |
| No. of deaths            | 267 | 12  | 63                | 121               | 56                | 15                |         |
| Age and Sex              |     | ref | 1.18 (0.64, 2.19) | 1.46 (0.81, 2.65) | 2.03 (1.09, 3.79) | 2.00 (0.93, 4.27) | 0.00    |

*Note:* Values are Hazard Ratio (95% CI) from Cox Proportional Hazards Model.

Values are adjusted for age (y) and sex only. P for trend was determined by entering the mid-point of each category in the model as a continuous variable.

**Appendix**  
**Causes of Death Associated With Prolonged TV Viewing: NIH-AARP Diet and Health Study**  
**Keadle et al.**

**Appendix Table 3.** Categorical Risk Estimates for TV Viewing and Cause-Specific Mortality Using Alternate Referent Group (1-2 h/day)

|                   |            | TV viewing        |           |                   |                   |                   |
|-------------------|------------|-------------------|-----------|-------------------|-------------------|-------------------|
|                   |            | <1 h/d            | 1-2h/d    | 3-4 h/d           | 5-6 h/d           | >=7 h/d           |
| <b>All causes</b> | No. deaths | 1,851             | 9,368     | 16,722            | 6,452             | 2,197             |
|                   | Model 1    | 0.95 (0.90, 1.00) | 1.0 (ref) | 1.09 (1.06, 1.11) | 1.18 (1.15, 1.22) | 1.39 (1.33, 1.46) |
|                   | Model 2    | 0.98 (0.93, 1.03) | 1.0 (ref) | 1.06 (1.03, 1.09) | 1.12 (1.09, 1.16) | 1.30 (1.24, 1.36) |
| <b>Cancer</b>     | No. deaths | 854               | 4026      | 6933              | 2555              | 793               |
|                   | Model 1    | 1.00 (0.93, 1.08) | 1.0 (ref) | 1.06 (1.02, 1.10) | 1.11 (1.05, 1.16) | 1.18 (1.09, 1.27) |
|                   | Model 2    | 1.02 (0.95, 1.10) | 1.0 (ref) | 1.05 (1.00, 1.09) | 1.08 (1.03, 1.14) | 1.14 (1.06, 1.23) |
| <b>CHD</b>        | No. deaths | 319               | 1805      | 3374              | 1328              | 514               |
|                   | Model 1    | 0.86 (0.76, 0.97) | 1.0 (ref) | 1.14 (1.08, 1.21) | 1.28 (1.19, 1.38) | 1.73 (1.56, 1.91) |
|                   | Model 2    | 0.92 (0.81, 1.03) | 1.0 (ref) | 1.08 (1.02, 1.15) | 1.15 (1.07, 1.24) | 1.50 (1.36, 1.66) |
| <b>Stroke</b>     | No. deaths | 100               | 461       | 792               | 310               | 85                |
|                   | Model 1    | 1.03 (0.83, 1.28) | 1.0 (ref) | 1.04 (0.92, 1.17) | 1.14 (0.98, 1.32) | 1.08 (0.85, 1.36) |
|                   | Model 2    | 1.06 (0.85, 1.32) | 1.0 (ref) | 1.02 (0.91, 1.14) | 1.09 (0.94, 1.27) | 1.03 (0.81, 1.30) |
| <b>COPD</b>       | No. deaths | 49                | 304       | 706               | 341               | 122               |
|                   | Model 1    | 0.88 (0.65, 1.20) | 1.0 (ref) | 1.20 (1.05, 1.37) | 1.37 (1.17, 1.61) | 1.52 (1.23, 1.88) |
|                   | Model 2    | 0.93 (0.69, 1.26) | 1.0 (ref) | 1.17 (1.02, 1.34) | 1.32 (1.12, 1.54) | 1.43 (1.16, 1.78) |
| <b>Accidents</b>  | No. deaths | 61                | 276       | 390               | 152               | 40                |
|                   | Model 1    | 1.03 (0.78, 1.36) | 1.0 (ref) | 0.90 (0.77, 1.05) | 1.05 (0.86, 1.29) | 1.01 (0.72, 1.41) |
|                   | Model 2    | 1.05 (0.79, 1.38) | 1.0 (ref) | 0.89 (0.76, 1.03) | 1.01 (0.83, 1.24) | 0.96 (0.69, 1.35) |
| <b>Alzheimer</b>  | No. deaths | 36                | 235       | 354               | 136               | 35                |
|                   | Model 1    | 0.73 (0.52, 1.04) | 1.0 (ref) | 0.93 (0.79, 1.10) | 1.05 (0.85, 1.30) | 1.02 (0.71, 1.47) |
|                   | Model 2    | 0.73 (0.51, 1.04) | 1.0 (ref) | 0.94 (0.80, 1.11) | 1.08 (0.87, 1.34) | 1.06 (0.74, 1.52) |
| <b>Diabetes</b>   | No. deaths | 30                | 138       | 365               | 164               | 70                |
|                   | Model 1    | 1.03 (0.69, 1.52) | 1.0 (ref) | 1.63 (1.34, 1.99) | 2.10 (1.67, 2.65) | 3.03 (2.25, 4.07) |
|                   | Model 2    | 1.19 (0.80, 1.76) | 1.0 (ref) | 1.47 (1.20, 1.79) | 1.68 (1.33, 2.11) | 2.28 (1.70, 3.07) |
| <b>Influenza</b>  | No. deaths | 22                | 149       | 244               | 92                | 43                |
|                   | Model 1    | 0.74 (0.47, 1.16) | 1.0 (ref) | 0.98 (0.80, 1.21) | 1.05 (0.80, 1.37) | 1.78 (1.25, 2.52) |
|                   | Model 2    | 0.77 (0.49, 1.20) | 1.0 (ref) | 0.96 (0.78, 1.18) | 1.00 (0.77, 1.31) | 1.67 (1.18, 2.38) |
| <b>Parkinson</b>  | No. deaths | 29                | 125       | 252               | 79                | 28                |
|                   | Model 1    | 1.11 (0.74, 1.66) | 1.0 (ref) | 1.32 (1.06, 1.63) | 1.29 (0.97, 1.72) | 1.88 (1.24, 2.85) |
|                   | Model 2    | 1.09 (0.73, 1.63) | 1.0 (ref) | 1.33 (1.07, 1.65) | 1.32 (0.99, 1.76) | 1.93 (1.27, 2.93) |
| <b>Kidney</b>     | No. deaths | 22                | 87        | 210               | 76                | 34                |
|                   | Model 1    | 1.28 (0.80, 2.05) | 1.0 (ref) | 1.38 (1.07, 1.78) | 1.33 (0.97, 1.82) | 1.97 (1.31, 2.96) |
|                   | Model 2    | 1.39 (0.87, 2.22) | 1.0 (ref) | 1.30 (1.01, 1.68) | 1.18 (0.86, 1.62) | 1.69 (1.12, 2.54) |
| <b>Sepsis</b>     | No. deaths | 13                | 86        | 198               | 68                | 30                |

**Appendix**  
**Causes of Death Associated With Prolonged TV Viewing: NIH-AARP Diet and Health Study**  
**Keadle et al.**

|                     |            |                   |           |                   |                   |                   |
|---------------------|------------|-------------------|-----------|-------------------|-------------------|-------------------|
|                     | Model 1    | 0.75 (0.42, 1.35) | 1.0 (ref) | 1.33 (1.03, 1.72) | 1.24 (0.90, 1.72) | 1.81 (1.18, 2.78) |
|                     | Model 2    | 0.82 (0.46, 1.47) | 1.0 (ref) | 1.25 (0.97, 1.61) | 1.08 (0.78, 1.49) | 1.51 (0.98, 2.31) |
| <b>Liver</b>        | No. deaths | 19                | 92        | 159               | 75                | 29                |
|                     | Model 1    | 0.97 (0.59, 1.59) | 1.0 (ref) | 1.08 (0.83, 1.40) | 1.47 (1.07, 2.01) | 1.97 (1.28, 3.02) |
|                     | Model 2    | 1.04 (0.63, 1.70) | 1.0 (ref) | 1.03 (0.79, 1.33) | 1.32 (0.96, 1.80) | 1.71 (1.11, 2.63) |
| <b>Suicide</b>      | No. deaths | 14                | 70        | 140               | 55                | 13                |
|                     | Model 1    | 0.93 (0.52, 1.66) | 1.0 (ref) | 1.30 (0.98, 1.74) | 1.58 (1.10, 2.27) | 1.38 (0.76, 2.51) |
|                     | Model 2    | 0.91 (0.51, 1.62) | 1.0 (ref) | 1.32 (0.99, 1.77) | 1.62 (1.13, 2.33) | 1.41 (0.77, 2.57) |
| <b>Hypertensive</b> | No. deaths | 12                | 63        | 121               | 56                | 15                |
|                     | Model 1    | 0.89 (0.48, 1.65) | 1.0 (ref) | 1.16 (0.85, 1.58) | 1.49 (1.03, 2.15) | 1.22 (0.56, 2.65) |
|                     | Model 2    | 0.96 (0.52, 1.79) | 1.0 (ref) | 1.10 (0.81, 1.49) | 1.33 (0.92, 1.93) | 1.17 (0.66, 2.09) |

*Note:* Values are Hazard Ratio (95% CI). Model 1 was adjusted for age (yrs), sex, race (white, black, other, missing), education (<12 yrs, high school graduate, some college, college graduate, missing), smoking history (never; quit, ≤20 cigarettes/day; quit, >20 cigarettes/day; current, ≤20 cigarettes/day; current, >20 cigarettes/day; unknown), MVPA (never or rarely, 1, 1–3, 4–7, ≥7 h/wk) and diet quality (quintiles). Model 2 was adjusted for the above plus BMI categories (18.5 to <25, 25–<30, 30–35 and >35 kg/m<sup>2</sup>) and health status (good, very good, excellent)

**Appendix**  
**Causes of Death Associated With Prolonged TV Viewing: NIH-AARP Diet and Health Study**  
**Keadle et al.**

**Appendix Figure 1.** Association between TV viewing and cause specific mortality stratified by sex: NIH-AARP Diet and Health Study.

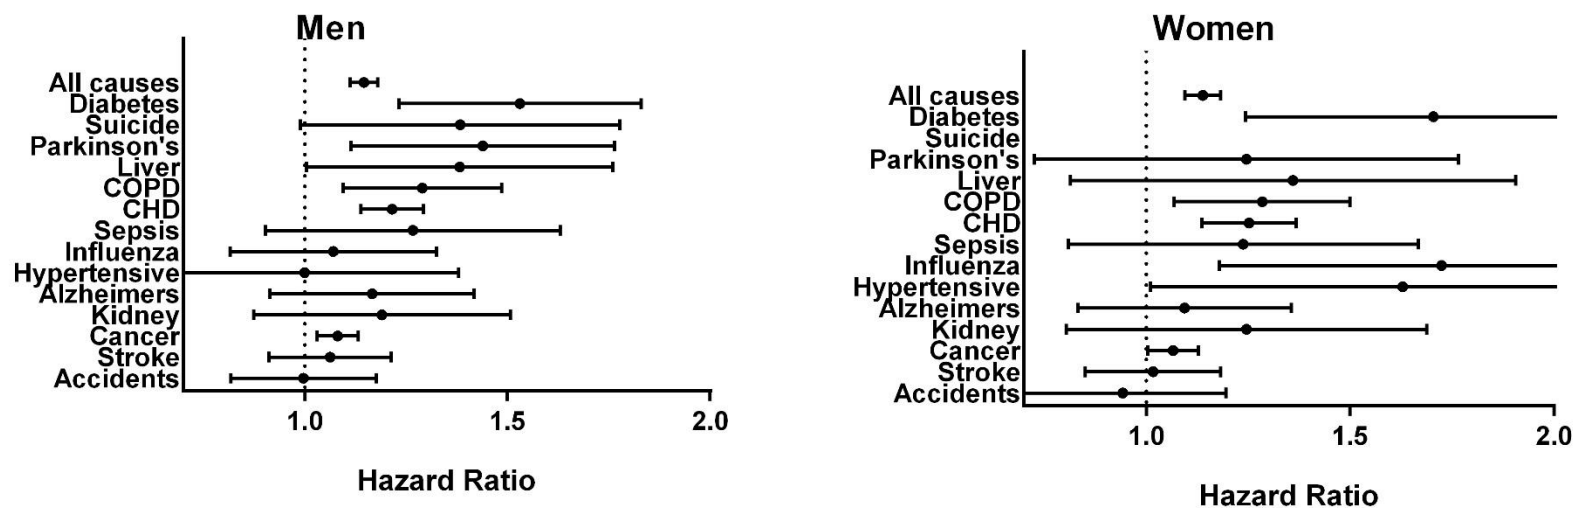

*Note:* Values are HRs and lines are the 95% CI, fully adjusted for covariates in Model 2.



**Appendix**  
**Causes of Death Associated With Prolonged TV Viewing: NIH-AARP Diet and Health Study**  
**Keadle et al.**

**Appendix Table 4.** Sensitivity Analyses Excluding First 3 years Follow-Up and Among Never Smokers

|              | Overall    |                   |                 | Excul 3 yrs follow-up |                   |                 | Never smoker |                   |                 |
|--------------|------------|-------------------|-----------------|-----------------------|-------------------|-----------------|--------------|-------------------|-----------------|
|              | No. deaths | HR (95% CI)       | <i>p</i> -value | No. deaths            | HR (95% CI)       | <i>p</i> -value | No. deaths   | HR (95% CI)       | <i>p</i> -value |
| All causes   | 36,590     | 1.14 (1.12, 1.17) | <0.001          | 34,480                | 1.14 (1.11, 1.17) | <0.001          | 9,805        | 1.14 (1.09, 1.19) | <0.001          |
| Cancer       | 15,161     | 1.07 (1.03, 1.11) | 0.01            | 14,249                | 1.06 (1.03, 1.11) | <0.01           | 3,746        | 1.09 (1.01, 1.17) | 0.02            |
| CHD          | 7,340      | 1.23 (1.17, 1.29) | <0.001          | 6,784                 | 1.23 (1.16, 1.30) | <0.001          | 2,121        | 1.19 (1.08, 1.31) | <0.01           |
| Stroke       | 1,748      | 1.03 (0.93, 1.15) | 0.54            | 1,645                 | 1.04 (0.93, 1.17) | 0.46            | 572          | 1.05 (0.87, 1.26) | 0.63            |
| COPD         | 1,522      | 1.28 (1.14, 1.43) | <0.001          | 1,481                 | 1.26 (1.13, 1.42) | <0.001          | 119          | 1.45 (0.97, 2.17) | 0.07            |
| Accidents    | 919        | 0.96 (0.83, 1.12) | 0.62            | 852                   | 0.95 (0.81, 1.11) | 0.50            | 303          | 0.93 (0.71, 1.20) | 0.56            |
| Alzheimer's  | 796        | 1.12 (0.95, 1.31) | 0.17            | 795                   | 1.12 (0.96, 1.32) | 0.16            | 299          | 0.99 (0.76, 1.28) | 0.91            |
| Diabetes     | 767        | 1.56 (1.33, 1.83) | <0.001          | 735                   | 1.54 (1.31, 1.81) | <0.001          | 232          | 1.61 (1.21, 2.14) | 0.001           |
| Influenza    | 550        | 1.24 (1.02, 1.50) | 0.03            | 529                   | 1.22 (1.00, 1.48) | 0.05            | 142          | 1.42 (0.98, 2.07) | 0.07            |
| Parkinson's  | 513        | 1.35 (1.11, 1.65) | <0.01           | 512                   | 1.35 (1.11, 1.65) | <0.01           | 190          | 1.33 (0.96, 1.85) | 0.08            |
| Kidney       | 429        | 1.18 (0.95, 1.47) | 0.13            | 419                   | 1.17 (0.94, 1.45) | 0.17            | 126          | 1.00 (0.67, 1.48) | 0.99            |
| Sepsis       | 395        | 1.22 (0.97, 1.52) | 0.0852          | 387                   | 1.21 (0.97, 1.52) | 0.10            | 94           | 1.62 (1.03, 2.54) | 0.04            |
| Liver        | 374        | 1.33 (1.05, 1.67) | 0.02            | 347                   | 1.28 (1.01, 1.62) | 0.05            | 97           | 1.37 (0.88, 2.15) | 0.17            |
| Suicide      | 292        | 1.43 (1.10, 1.85) | 0.01            | 257                   | 1.33 (1.01, 1.76) | 0.04            | 78           | 1.76 (1.07, 2.90) | 0.03            |
| Hypertensive | 267        | 1.21 (0.92, 1.59) | 0.18            | 256                   | 1.19 (0.90, 1.58) | 0.21            | 91           | 1.29 (0.81, 2.05) | 0.28            |

Hazard ratio (HR) from Cox Proportional Hazards Regression for every 2 h/day increase in TV viewing. Values were adjusted for age (y), race (white, black, other, missing), education (<12 y, high school graduate, some college, college graduate, missing), MVPA (never or rarely, 1, 1–3, 4–7, ≥7 h/wk), BMI (18.5 to <25, 25–<30, 30–35 and >35 kg/m<sup>2</sup>) health status (good, very good, excellent) and diet quality (quintiles). The overall and exclusion of 3 years follow-up are also adjusted for smoking history (never; quit, <20 cigarettes/d; quit, ≥20 cigarettes/d; current, < 20 cigarettes/d; current, ≥20 cigarettes/d; unknown).
